# Supplementary material for: Droplet Barcode Sequencing for targeted linked-read haplotyping of single DNA molecules
Source: PubMed Central journal article supplement — Nucleic Acids Res. 2017 May 19;45(13):e125. doi: 10.1093/nar/gkx436 (PMC5569991; doi:10.1093/nar/gkx436), 2017-05-19
Supplement: gkx436_supp.pdf [file gkx436_supp.pdf]

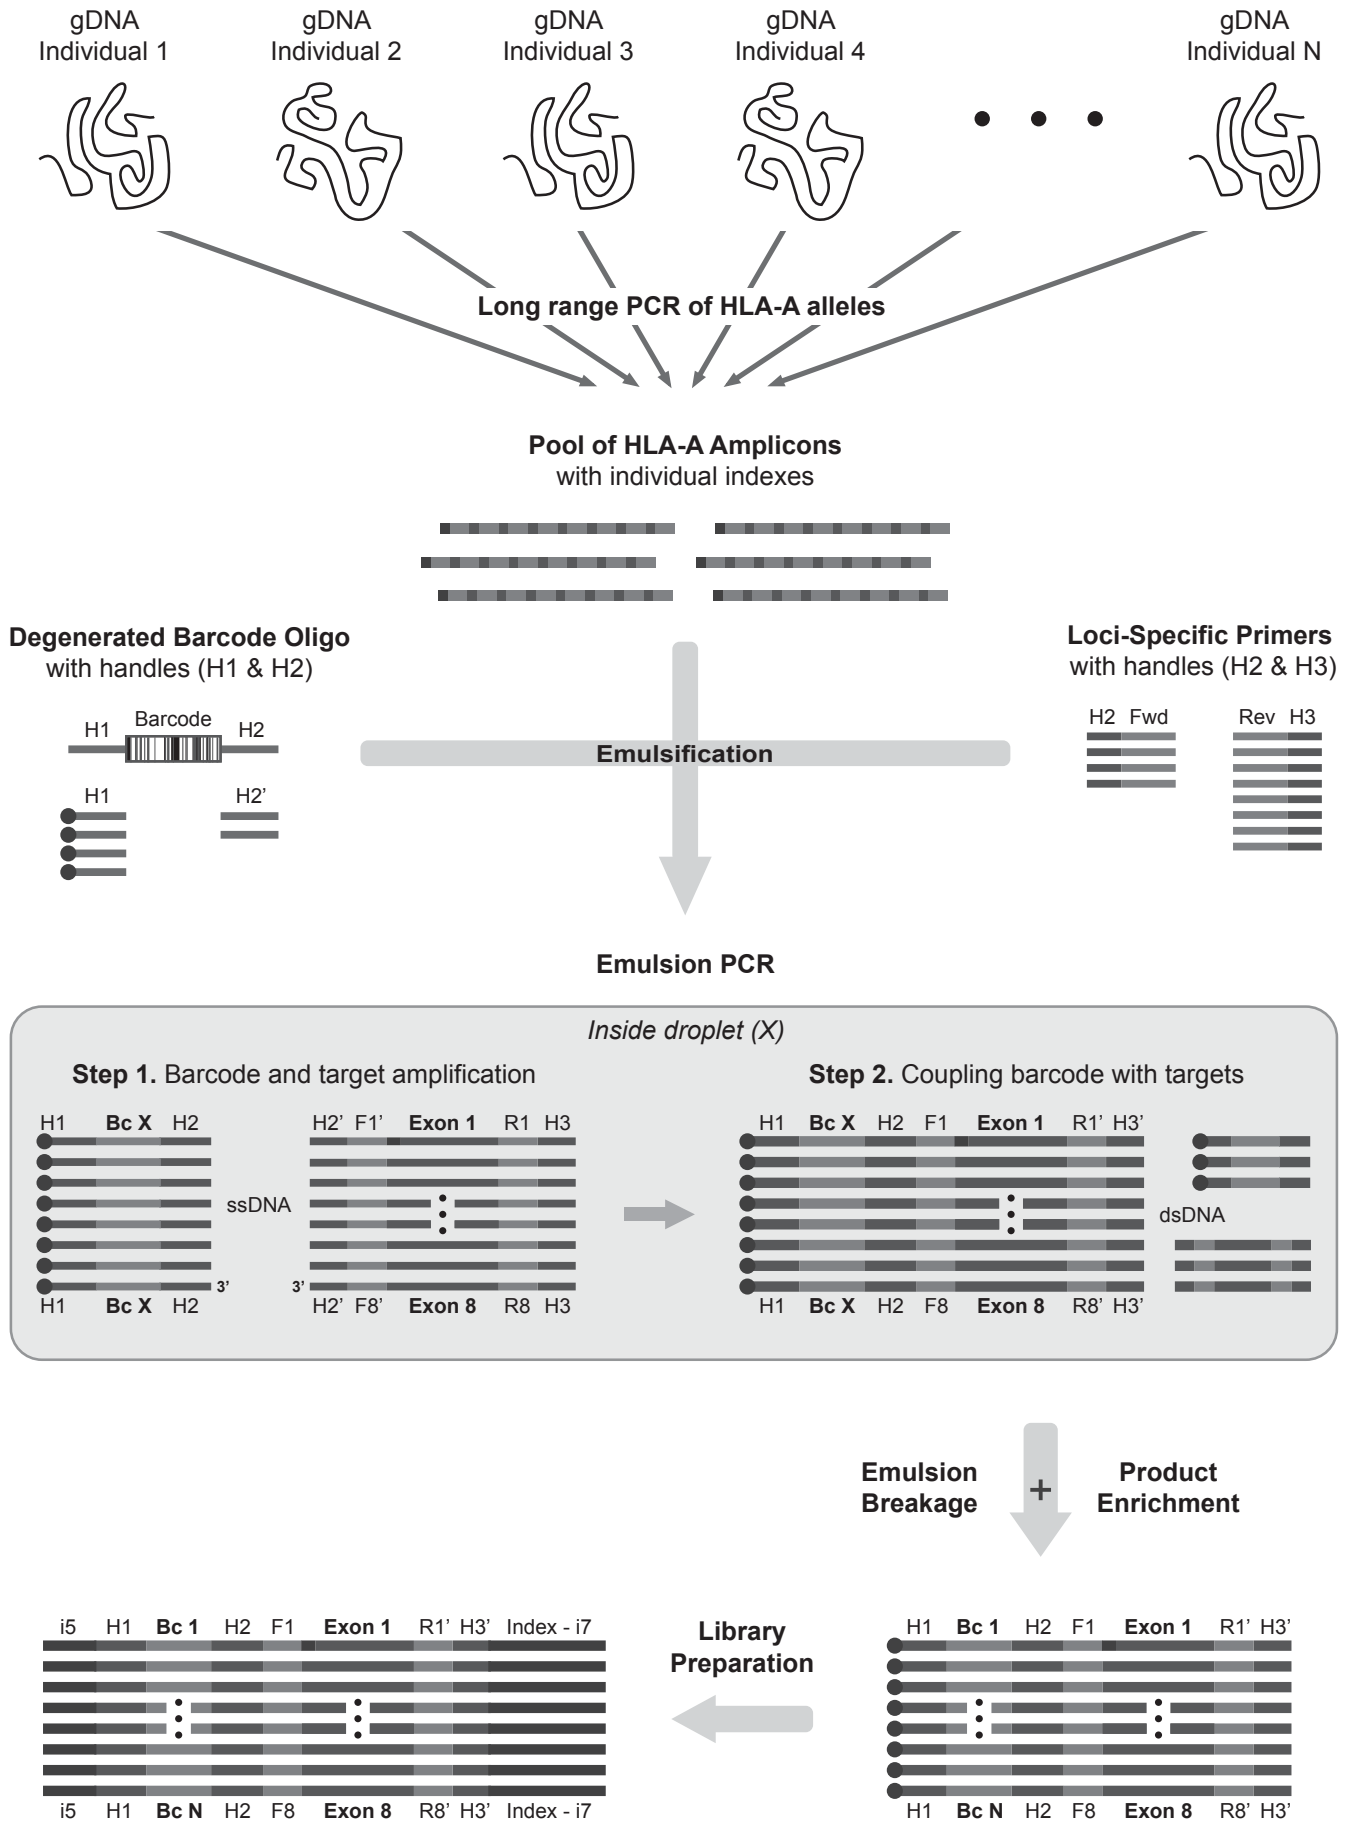

**Supplementary Figure 1.** Detailed assay overview. First, a long range PCR with sample-specific indexed primers (Supplementary Table 1 and 2) is performed to amplify the target HLA-A gene. An equimolar pool of HLA-A long range amplicons is then prepared and diluted to enable compartmentalization of single molecules by emulsification. Along with a single template molecule, a number of synthetic oligonucleotides (Supplementary Table 3) are incorporated into the emulsion droplets at the same time. Like the pool of template molecules, barcoding oligonucleotides are diluted to be present in single copies in the droplets to yield a unique (albeit unknown) barcode population in each droplet following amplification. Short synthetic oligonucleotides enable amplification of both the barcoding oligonucleotide and seven different target loci of the template molecule. The amplification reaction is asymmetric for both sets of templates (i.e. barcodes and sample templates), resulting in a shift in the equilibrium of the polymerase chain reaction towards single stranded DNA products. This is achieved by having an excess of oligo Bio-H1 in respect to oligo H2' (at a ratio of 8:1), as well as an excess of H3-R1 – H3-R8 oligos in respect to H2<sub>10</sub>-F1 – H2<sub>10</sub>-F8 oligos (at a ratio of 5:1; see Supplementary Table 3). The loci-specific primers were designed to target intronic regions flanking each of the 8 exons of the HLA-A gene. Once a critical concentration of single stranded products has been generated, and the oligonucleotides in limited supply have been depleted, the two PCR products can interact by means of a 10 bp complementary sequence (Emulsion PCR - Step 2). This coupling reaction occurs at a lower annealing temperature to account for the short sequence of complementarity (Supplementary Table 4). When complete, coupling of a clonally amplified barcode to each of the target loci is thereby achieved, yielding double stranded DNA products. Following emulsion breakage, products are then enriched by means of size exclusion to get rid of the excess uncoupled barcoding molecules. The biotinylated H1 oligonucleotide enables a second enrichment step of coupled products to streptavidin-coated beads, to get rid of similarly sized uncoupled loci-specific PCR products. Finally, following enrichment the bead-bound products are released by an indexing PCR to attach sequencing adaptors. The finished library is then sequenced and data is analysed using a custom-built analysis pipeline (see Materials & Methods).

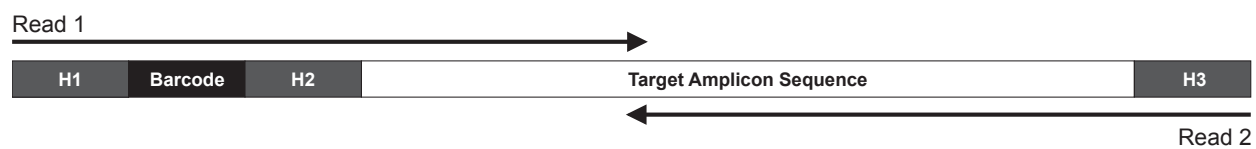

H1: ACCGAGTGGTGAGTCATAGT

Barcode: BDVHBDVHBDVHBDVHBDVH

H2: CTAGCTTCACGAGTTCATCG

H3: AGATGGCCGTTATGATAGCG

**Supplementary Figure 2.** Structure of sequencing reads and handles.

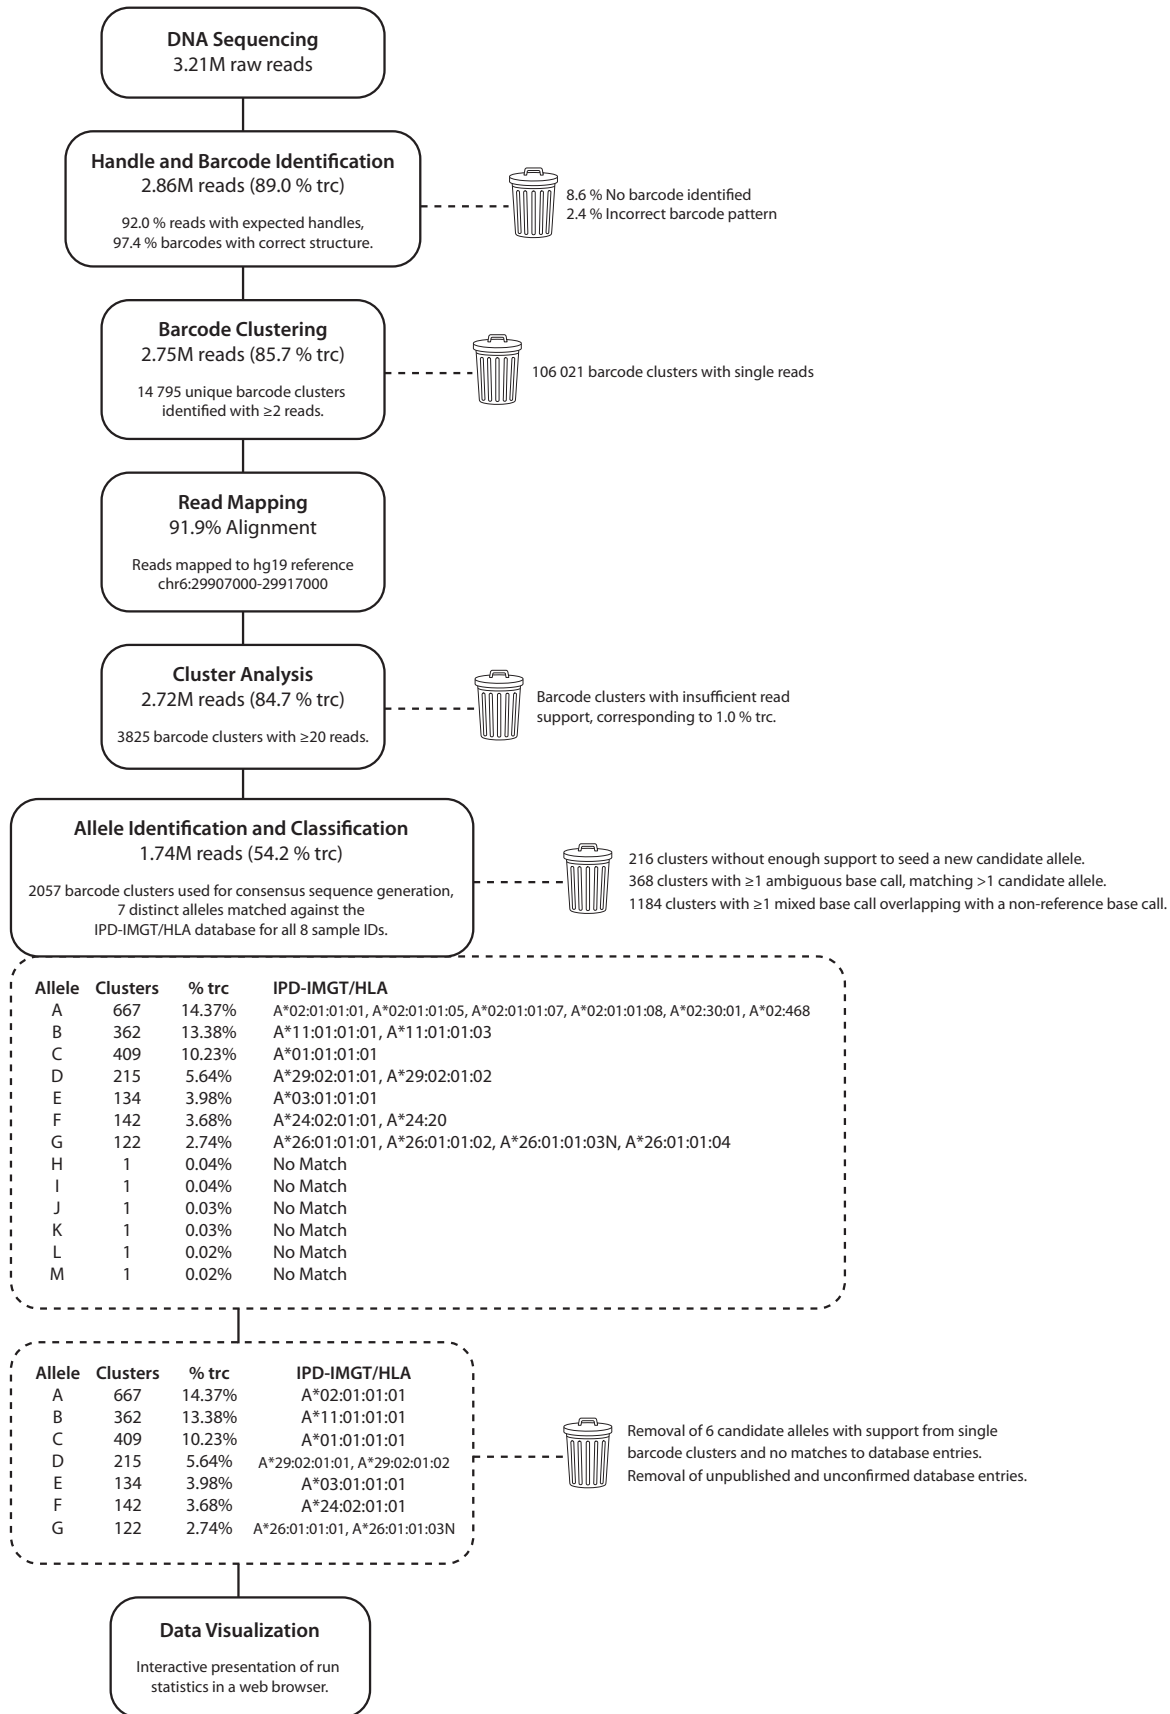

**Supplementary Figure 3.** Flowchart of data analysis steps, detailing read counts and barcode cluster counts for the 8-plex reaction. % trc corresponds to percentage of the total read count (i.e. raw reads).

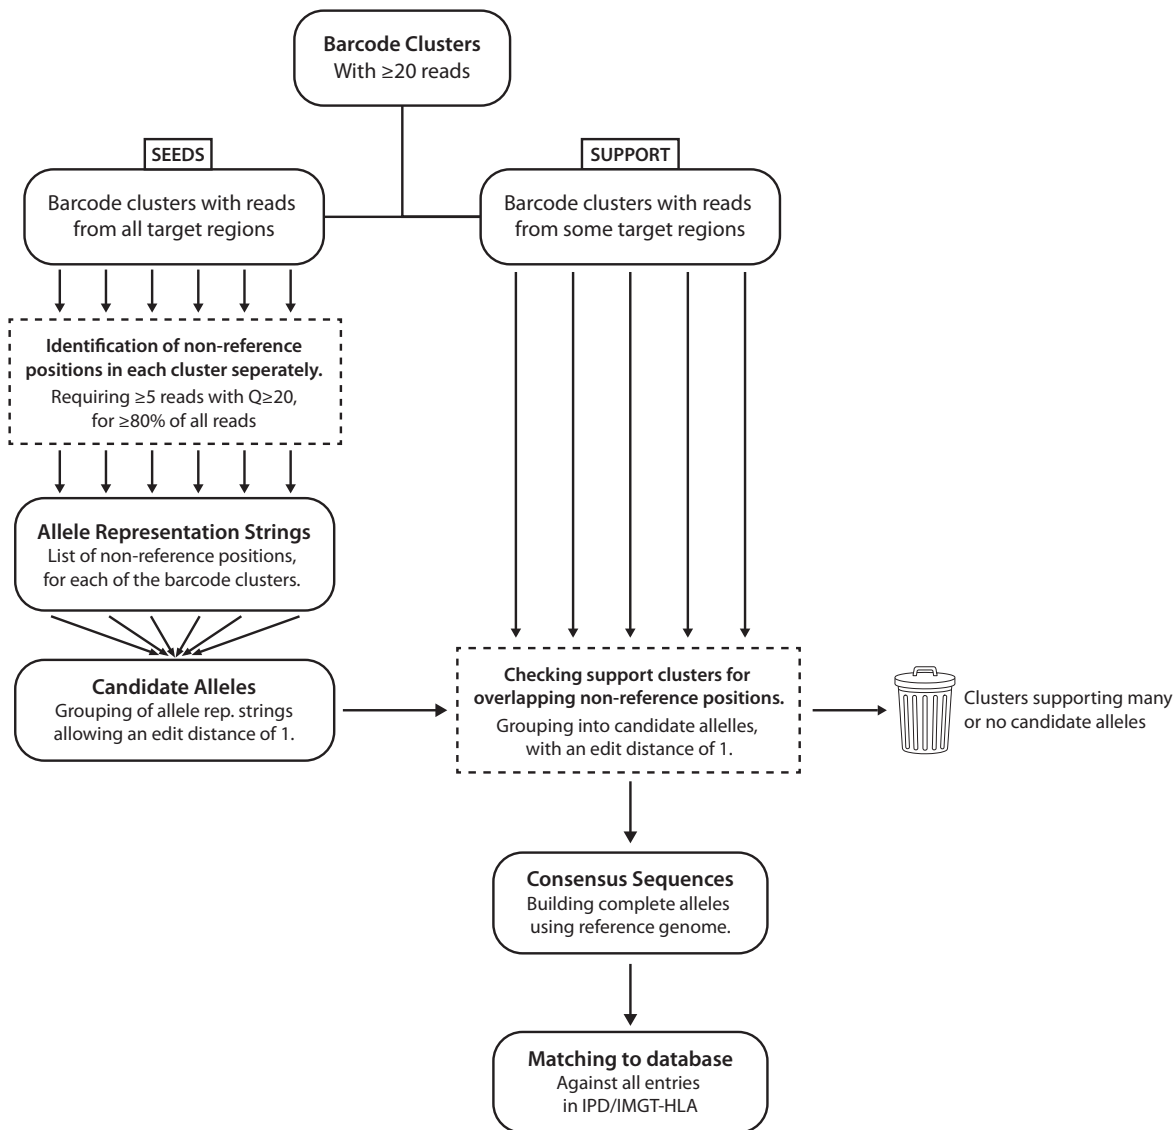

**Supplementary Figure 4.** Flowchart detailing the procedure for building and identifying alleles from barcode clusters with at least 20 reads. It is worth noting that this bioinformatic solution does not distinguish between supporting barcode clusters that are truly non-clonal clusters (i.e. those that stem from multiple input molecules), and those with an error profile that exceeds our cutoff of allowing (at the most) an edit distance of 1. This filtering of supporting barcode clusters could most likely be made less stringent, but considering the purpose of this study is to perfectly call all variant alleles we did not deem it necessary.

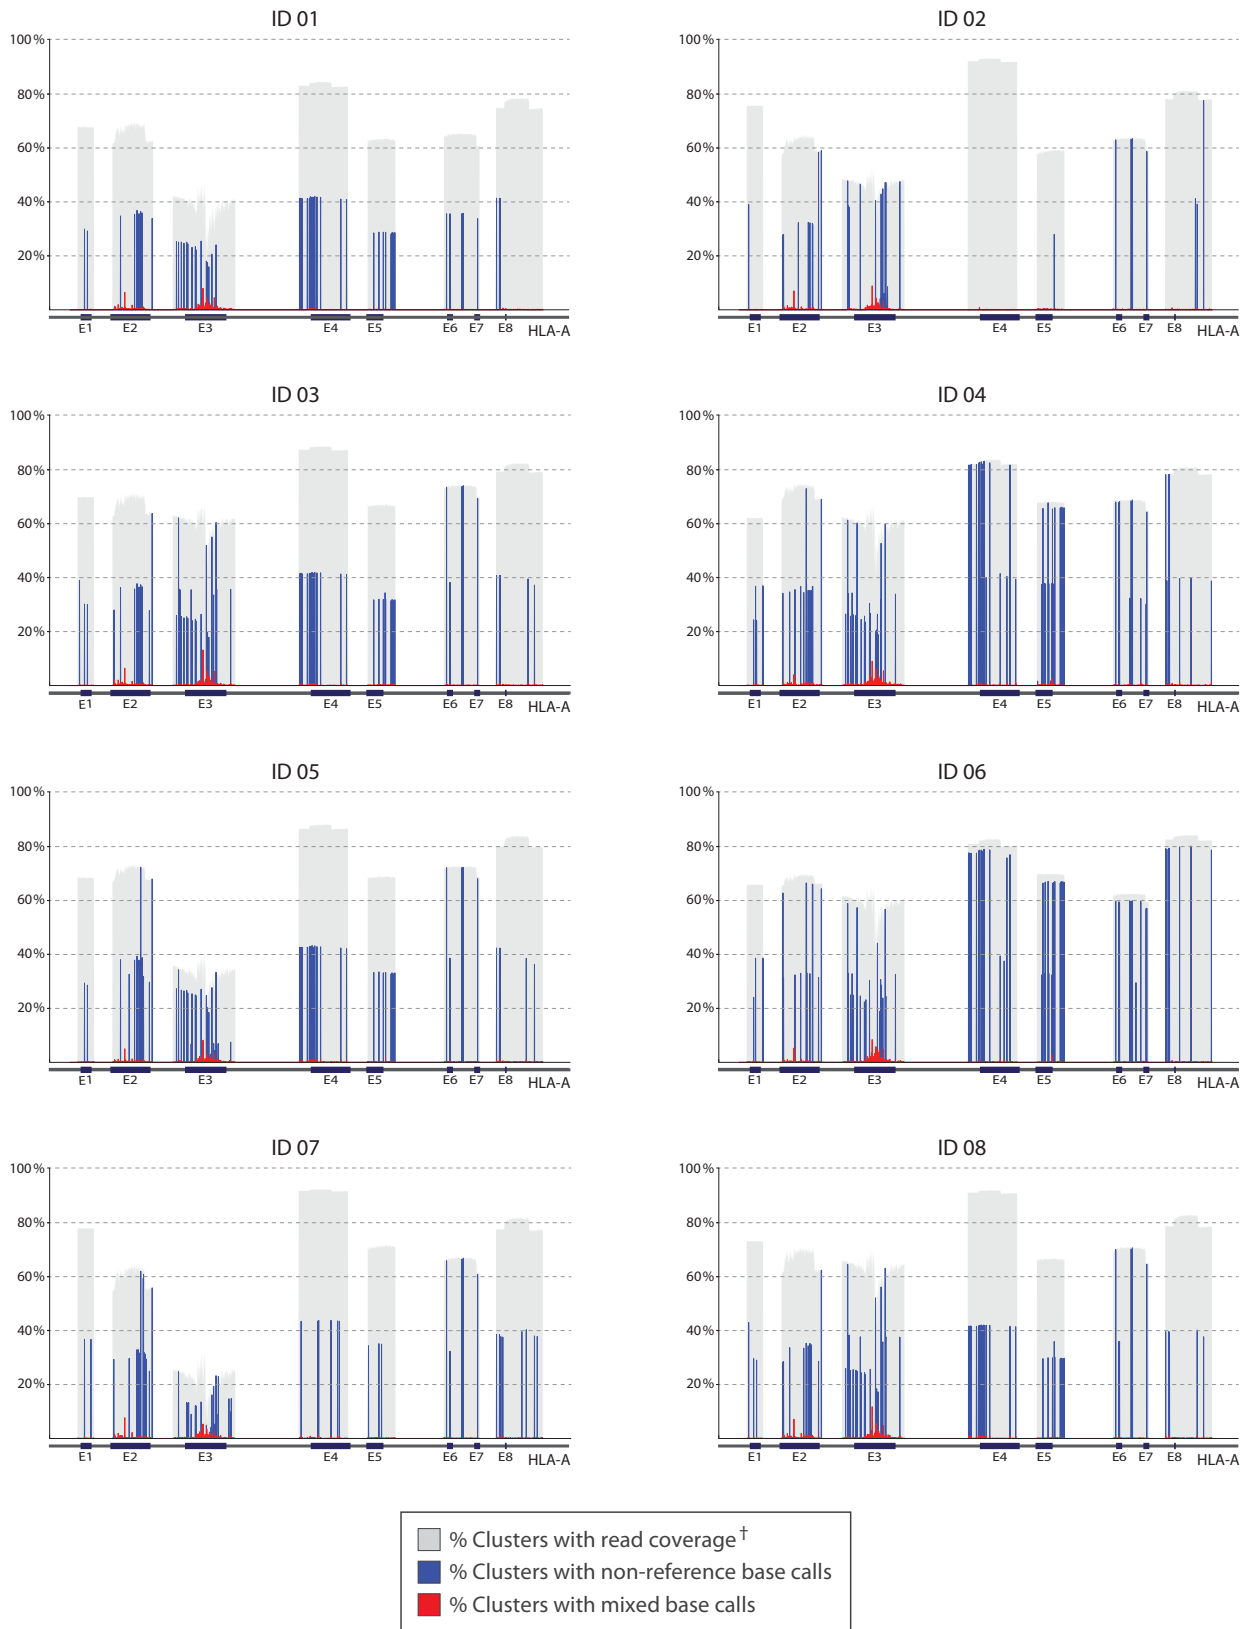

**Supplementary Figure 5.** Haplotyping results visualized for all sample ID singleplex reactions, with data from all clusters with  $\geq 20$  reads (i.e. before filtering of barcode clusters not contributing to the formation of consensus sequences, as depicted in Supplementary Figure 4). † Base calling of each position supported by  $\geq 5$  reads with a quality score  $\geq 20$ . Dips in the sequencing coverage for the middle of the target covering exon 3 is due to this region not being covered by read 1, in combination with a high sequencing error profile at the end of read 2.

A

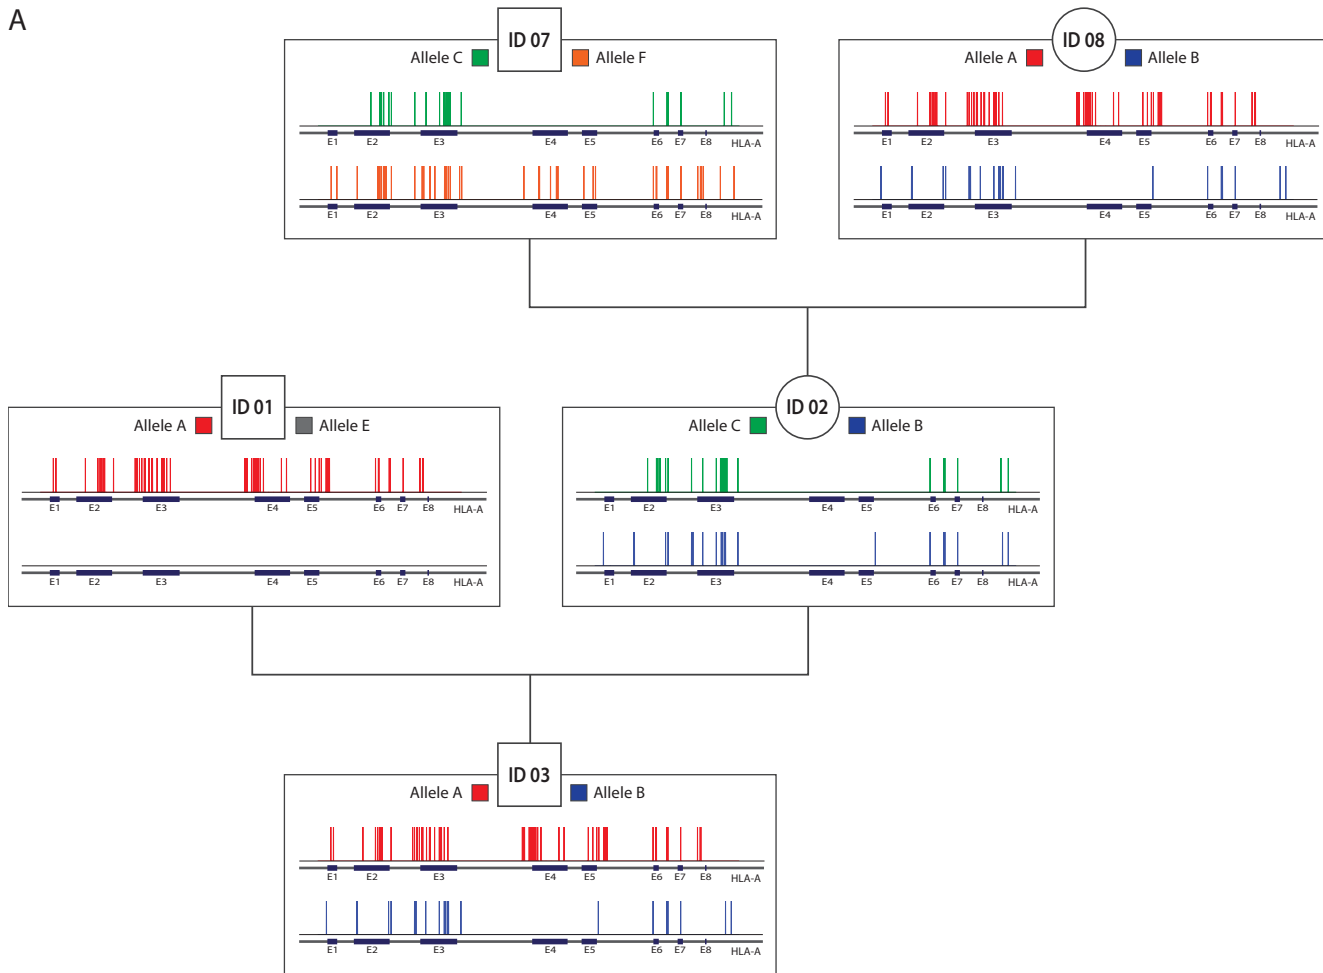

B

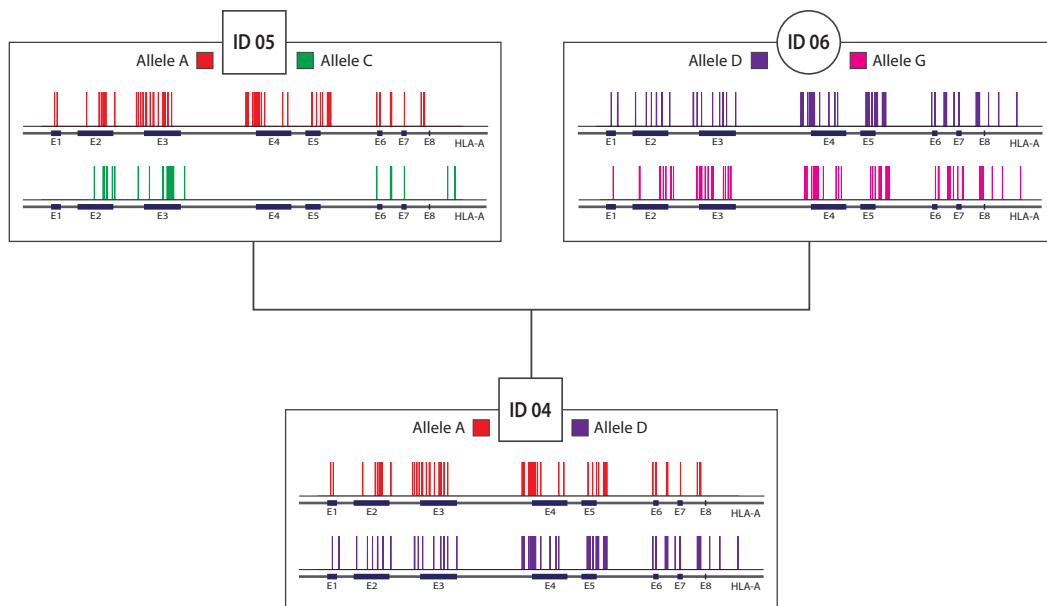

**Supplementary Figure 6.** Pedigree visualization of allele heredity for (A) extended family of Trio 1 and 2, and (B) Trio 3; showing positions of all non-reference base calls across the HLA-A gene, for each allele identified within the 8 samples.

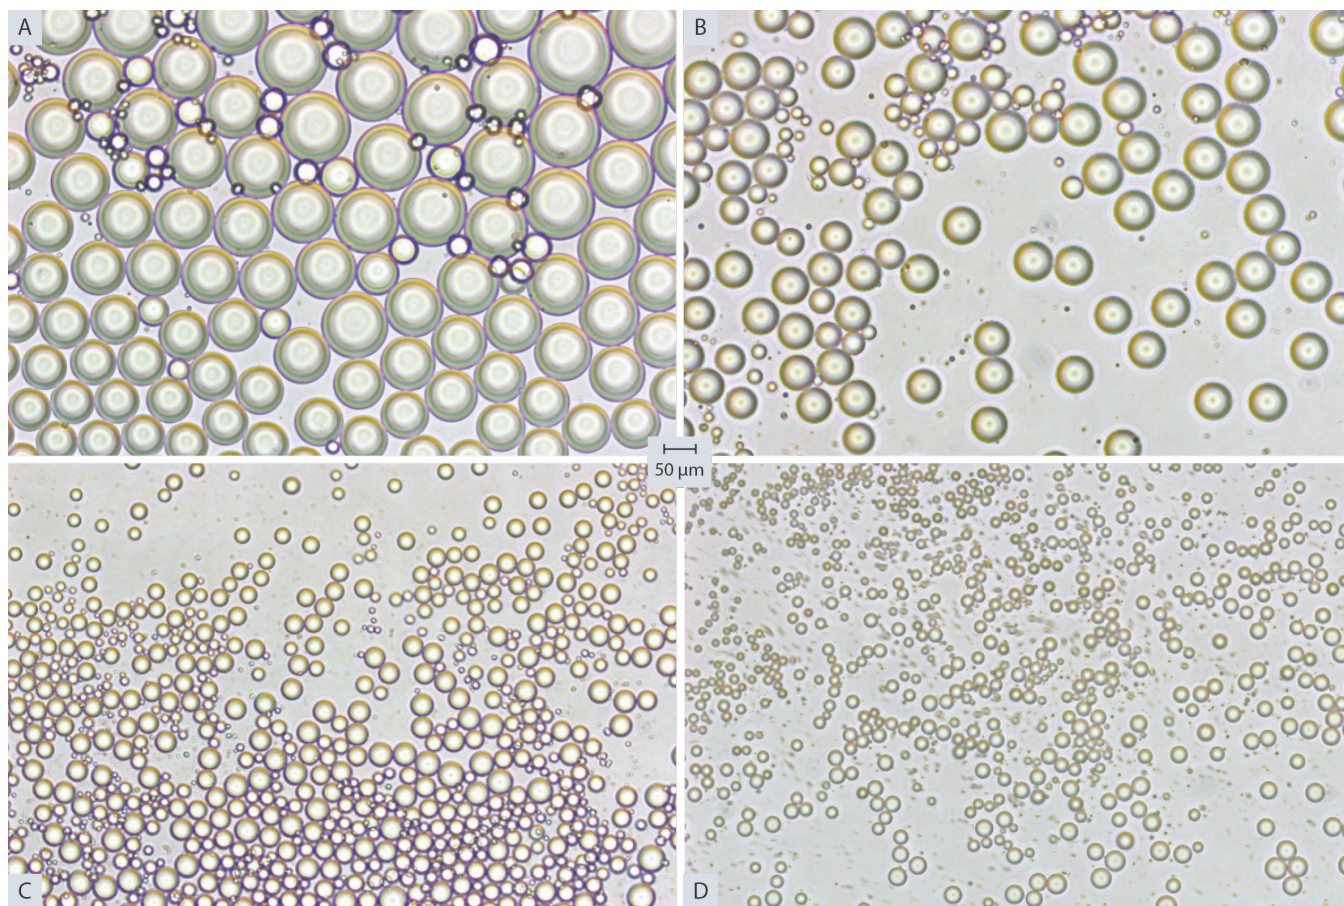

**Supplementary Figure 7.** Emulsion droplets generated by controlled oscillation at set frequencies; (A) 11 Hz, (B) 13 Hz, (C) 15 Hz, and (D) 17 Hz. For reasons detailed in Supplementary Note 1, emulsions generated at 15 Hz were deemed the best for our assay reactions.



**Supplementary Table 1.** HLA-A Long range PCR indexing of Coriell gDNA samples

| <b>Sample ID</b> | <b>ID Index Sequence</b> | <b>Long range PCR Forward primer</b> | <b>Coriell gDNA Individual</b> | <b>Coriell Trio (Family relation)</b> | <b>Sex</b> |
|------------------|--------------------------|--------------------------------------|--------------------------------|---------------------------------------|------------|
| 01               | ACAGTC                   | LR.F01                               | NA12877                        | Trio 2: Parent                        | Male       |
| 02               | TGATGC                   | LR.F02                               | NA12878                        | Trio 1: Child<br>Trio 2: Parent       | Female     |
| 03               | GTCGAT                   | LR.F03                               | NA12882                        | Trio 2: Child                         | Male       |
| 04               | TGAGTG                   | LR.F04                               | NA10860                        | Trio 3: Child                         | Male       |
| 05               | GTACTG                   | LR.F05                               | NA11992                        | Trio 3: Parent                        | Male       |
| 06               | TAGCTG                   | LR.F06                               | NA11993                        | Trio 3: Parent                        | Female     |
| 07               | AGTCTG                   | LR.F07                               | NA12891                        | Trio 1: Parent                        | Male       |
| 08               | TCACGT                   | LR.F08                               | NA12892                        | Trio 1: Parent                        | Female     |

**Supplementary Table 2.** Synthetic oligonucleotides for long range PCR and library preparation.

Note: Index sequence for i7'-H3 oligo were variable TruSeq LT indexes for Illumina's sequencing platform.

| Name   | Sequence (5' - 3')                                                                          |
|--------|---------------------------------------------------------------------------------------------|
| LR.F01 | TTAGTCTCCGACGGCAGGCTTCAATACAGTCACGCACCCACCGGGACTCAG                                         |
| LR.F02 | TTAGTCTCCGACGGCAGGCTTCAATTGATGCACGCACCCACCGGGACTCAG                                         |
| LR.F03 | TTAGTCTCCGACGGCAGGCTTCAATGTGATACGCACCCACCGGGACTCAG                                          |
| LR.F04 | TTAGTCTCCGACGGCAGGCTTCAATTGAGTGACGCACCCACCGGGACTCAG                                         |
| LR.F05 | TTAGTCTCCGACGGCAGGCTTCAATGTACTGACGCACCCACCGGGACTCAG                                         |
| LR.F06 | TTAGTCTCCGACGGCAGGCTTCAATTAGCTGACGCACCCACCGGGACTCAG                                         |
| LR.F07 | TTAGTCTCCGACGGCAGGCTTCAATAGTCTGACGCACCCACCGGGACTCAG                                         |
| LR.F08 | TTAGTCTCCGACGGCAGGCTTCAATTCACGTACGCACCCACCGGGACTCAG                                         |
| LR.R   | ATATAACCATCATCGTGTCCCAAGGTTT                                                                |
| H1     | ACCGAGTGGTGAGTCATAGT                                                                        |
| H3     | AGATGGCCGTTATGATAGCG                                                                        |
| i5-H1  | AATGATACGGCGACCACCGAGATCTACACTCTTTCCTACACGACGCTCTT<br>CCGATCTACCGAGTGGTGAGTCATAGT           |
| i7'-H3 | CAAGCAGAAGACGGCATAACGAGAT-INDEX-ACGTGACTGGAGTTCAGACG<br>TGTGCTCTCCGATCTAGATGGCCGTTATGATAGCG |

**Supplementary Table 3.** Sequence specification and composition of oligonucleotides in emulsion reactions.

| <b>Name</b>            | <b>Sequence (5' - 3')</b>                                        | <b>Reaction Concentration</b> |
|------------------------|------------------------------------------------------------------|-------------------------------|
| Bio-H1                 | Biotin-ACCGAGTGGTGAGTCATAGT                                      | 400 nM                        |
| Barcoding Oligo        | ACCGAGTGGTGAGTCATAGTBDVHBDVHBDVHBDVHBDVH<br>CTAGCTTCACGAGTTCATCG | 100 fM                        |
| H2'                    | CGATGAACTCGTGAAGCTAG                                             | 50 nM                         |
| H2 <sub>10</sub> -F1   | GAGTTCATCGTTAGTCTCCGACGGCAGGCTTCAAT                              | 40 nM                         |
| H2 <sub>10</sub> -F2   | GAGTTCATCGCCCAGGCTCYCACTCCATGA                                   | 40 nM                         |
| H2 <sub>10</sub> -F3   | GAGTTCATCGGCGCCTTWACCCGGTTTCATT                                  | 50 nM                         |
| H2 <sub>10</sub> -F4   | GAGTTCATCGCCCGGGTGTCCTGTCCATTC                                   | 30 nM                         |
| H2 <sub>10</sub> -F5   | GAGTTCATCGCCCAGAGCYRTCTTCCCAGC                                   | 20 nM                         |
| H2 <sub>10</sub> -F6:7 | GAGTTCATCGGCCCTGYCTCCTTTCTGGTATC                                 | 40 nM                         |
| H2 <sub>10</sub> -F8   | GAGTTCATCGTGAGCATGCGATGGGCTGTT                                   | 40 nM                         |
| H3-R1                  | AGATGGCCGTTATGATAGCGTCCCCGCAGAGGCGGTTTCC                         | 200 nM                        |
| H3-R2                  | AGATGGCCGTTATGATAGCGGGGATGAGRGGTCSTGACCT                         | 200 nM                        |
| H3-R3                  | AGATGGCCGTTATGATAGCGTGTGGTCCCAATTGTCTCCC                         | 250 nM                        |
| H3-R4                  | AGATGGCCGTTATGATAGCGTACCCCATCTCAGGGTGAGG                         | 150 nM                        |
| H3-R5                  | AGATGGCCGTTATGATAGCGTTGTGGAHGGTGCTTCCCAG                         | 100 nM                        |
| H3-R6:7                | AGATGGCCGTTATGATAGCGGGYCTSCARGCTCTCACCTT                         | 200 nM                        |
| H3-R8                  | AGATGGCCGTTATGATAGCGCAGCTCAGTGCACCATGAAGT                        | 200 nM                        |

**Supplementary Table 4.** Emulsion PCR protocol.

| <b>Step</b> | <b>Cycles</b> | <b>Temperature</b> | <b>Duration</b> | <b>Ramp Speed</b> |
|-------------|---------------|--------------------|-----------------|-------------------|
| 1           | 1             | 94°C               | 3 min           | 40%               |
| 2           | 5             | 94°C               | 1 min           | 40%               |
| 2           | 5             | 45°C               | 2 min           | 40%               |
| 2           | 5             | 72°C               | 2 min           | 20%               |
| 3           | 21            | 94°C               | 1 min           | 40%               |
| 3           | 21            | 55°C               | 2 min           | 40%               |
| 3           | 21            | 72°C               | 2 min           | 20%               |
| 4           | 12            | 94°C               | 1 min           | 40%               |
| 4           | 12            | 25°C               | 1 min           | 20%               |
| 4           | 12            | 72°C               | 2 min           | 10%               |
| 5           | 1             | 72°C               | 5 min           | 100%              |
| 6           | 1             | 20°C               | 1 min           | 10%               |
| 7           | 1             | 10°C               | HOLD            | 10%               |

**Supplementary Table 5.** Data quantified in terms of generated barcode clusters for each assay reaction.

| <b>Sample Reaction</b> | <b>Read pairs with barcode</b> | <b>Total Barcode Clusters</b> | <b>Barcode Clusters (1 read)</b> | <b>Barcode Clusters (<math>\geq 2</math> reads)</b> | <b>Barcode Clusters (<math>\geq 20</math> reads)</b> | <b>Filtered Barcode Clusters [% tot reads]</b> |
|------------------------|--------------------------------|-------------------------------|----------------------------------|-----------------------------------------------------|------------------------------------------------------|------------------------------------------------|
| 01                     | 1 487 060                      | 74 709                        | 64 975                           | 9 734                                               | 2 069                                                | 1 231 [53.1%]                                  |
| 02                     | 1 320 082                      | 56 289                        | 48 935                           | 7 354                                               | 1 488                                                | 981 [60.9%]                                    |
| 03                     | 1 359 780                      | 61 071                        | 53 515                           | 7 556                                               | 2 097                                                | 1 504 [72.9%]                                  |
| 04                     | 1 306 578                      | 57 455                        | 49 738                           | 7 717                                               | 1 247                                                | 788 [57.3%]                                    |
| 05                     | 1 564 702                      | 77 826                        | 67 713                           | 10 113                                              | 1 411                                                | 955 [63.5%]                                    |
| 06                     | 1 513 428                      | 88 414                        | 76 525                           | 11 889                                              | 1 335                                                | 917 [64.1%]                                    |
| 07                     | 1 262 517                      | 57 155                        | 47 904                           | 9 251                                               | 2 054                                                | 1 491 [63.6%]                                  |
| 08                     | 1 372 462                      | 60 055                        | 52 580                           | 7 475                                               | 2 377                                                | 1 544 [69.0%]                                  |
| 8-Plex                 | 2 859 364                      | 120 816                       | 106 021                          | 14 795                                              | 3825                                                 | 2057 [54.2%]                                   |

## Supplementary Note 1. Generating emulsions.

Generating droplets using shaking of two immiscible phases (aqueous and oil) leads to a broad range of droplet in different sizes. But by controlling the conditions (oscillation frequency, time, volumes and reagents) we can tune the size range and obtain these results in a reproducible fashion. Using a Tissuelyser (Qiagen) instrument (typically used to generate cell suspensions from tissues), the oscillation frequency can be set from 3.0 Hz to 30.0 Hz (+/- 0.1 Hz), and for emulsions this offers control of the range of droplet sizes. We have found that the tube volume, aqueous phase volume, and oil phase volume all influence the size distribution due to their effect on forces generated during shaking. To simplify the optimization process we decided to keep the variables of shaking time and volumes constant to study the effect of oscillation frequency on droplet sizes. Supplementary Figure 7 shows a representative view of emulsions generated with four different oscillation frequencies (11 Hz, 13 Hz, 15 Hz and 17 Hz). In such emulsions we can observe a varying range of droplet sizes, as well as the spread of this range. When the oscillation frequency is low (11 Hz) we see droplets ranging from 5  $\mu\text{m}$  (65 fl) to 200  $\mu\text{m}$  (4.2 nl), while when the oscillation frequency is high (17 Hz) we observe a range from 1  $\mu\text{m}$  (0.5 fl) to 30  $\mu\text{m}$  (14.1 pl). We came to the conclusion that emulsions generated with a frequency of 15 Hz were the best as they yielded the highest proportion of droplets within the range of 10-30  $\mu\text{m}$  (motivated by discussion below). For emulsions generated at an oscillation frequency of 15 Hz we estimated the average droplet size to be 15-20  $\mu\text{m}$ , and based assay parameters on this assumption (Supplementary Note 2).

The idea of using emulsions generated by shaking to enable high throughput assays is not novel; it for instance constitutes a fundamental step in the process of preparing sequencing libraries for the 454 and Ion Torrent sequencing platforms. However, most of the recently published and/or commercialized emulsion-based technologies rely on droplets generated using microfluidic devices to obtain a more monodisperse population of reaction compartments. While this reduces the need for optimization of reagent concentrations, there are important drawbacks that limit the spread of this technology. Setting up microfluidics-based droplet generation requires at its minimum a set of very precise pumps and microfluidic chips for consumption. Such items are available from commercial vendors (e.g. Dolomite Microfluidics) but the expense of single-use microfluidic chips means it is not a feasible solution for most labs. Instead, the alternative to produce chips in-house is what most labs working with droplet technologies have opted for, but the manufacture of high quality devices requires expertise not readily available.

Regardless if droplets are generated on-chip or by shaking, the most important aspect of emulsion technologies is the stability of droplets, in particular when exposed to thermal cycling (e.g. PCR). Droplet stability is typically improved by adding an amphiphilic chemical surfactant that sits in the interface between water and oil, stabilizing the droplets to prevent coalescence (droplet merging). Very few surfactants are good enough to allow emulsion reactions to undergo long PCR reactions; we have found the commercially available 008-FluoroSurfactant (RAN Biotechnologies) to be the best. Other factors that can influence droplet stability are the carrier oil, the composition of the aqueous phase, and the size the generated droplets. Large droplets are typically less stable than smaller droplets since they have a higher surface area (with stabilizing surfactant molecules) in relation to their volume. Our observations show that droplets up to ~50  $\mu\text{m}$  can be PCR cycled up to 35 cycles without significant merging. Although stable through PCR, small droplets (<10  $\mu\text{m}$ ) will statistically be less likely to contain all the necessary reagents for the assay, so in order to ensure assay efficiency the size distribution of droplets has been optimized.

## Supplementary Note 2. Evaluating monoclonality based on emulsion parameters.

Unique droplet barcoding in this assay is based on the dilution of barcoding oligonucleotides and template molecules to obtain a single copy of each molecule in emulsion droplets. Random distribution of molecules is modeled by the Poisson distribution where an occupancy of, for example 0.1 molecules per droplet (m.p.d.), will result in ~90% empty droplets and ~9% of the occupied droplets will be monoclonal (i.e. only contain one molecule). Having two reagents that each ought to be present in single copies effectively doubles the effect of the Poisson distribution. Two sets of independent molecules, each loaded with 0.1 m.p.d., would thus yield roughly  $0.095 \cdot 0.095 \approx 0.9\%$  of droplets containing one of each molecule.

Determining the number of active droplets in emulsions generated by shaking is no trivial matter, but our observations of emulsions generated at 15 Hz suggest that we can estimate a conservative average of droplet size of 15 – 20  $\mu\text{m}$  in diameter (Supplementary Note 1). While this seems like a small range, there is roughly a two-fold difference in the average volume (1.8 – 4.2 pl droplets in a 50  $\mu\text{l}$  reaction); yielding an estimated range that spans from 12 million to 28 million droplets total in our assay. Given that we have approximately 3 million barcoding oligonucleotides and 2 million HLA template molecules (in the 8-plex reaction), we ought to expect the following theoretical yields of droplet barcodes:

*Barcode m.p.d.  $\times$  Template m.p.d. = % Droplets with both barcode and template*

[15  $\mu\text{m}$  average]  $\leftrightarrow$   $\sim 28 \cdot 10^6$  droplets

$$\frac{3 \cdot 10^6 \text{ barcodes}}{28 \cdot 10^6 \text{ droplets}} \times \frac{2 \cdot 10^6 \text{ templates}}{28 \cdot 10^6 \text{ droplets}} = 0.76\% \text{ Occupancy} \rightarrow 215\,000 \text{ droplet barcodes}$$

[20  $\mu\text{m}$  average]  $\leftrightarrow$   $\sim 12 \cdot 10^6$  droplets

$$\frac{3 \cdot 10^6 \text{ barcodes}}{12 \cdot 10^6 \text{ droplets}} \times \frac{2 \cdot 10^6 \text{ templates}}{12 \cdot 10^6 \text{ droplets}} = 4.17\% \text{ Occupancy} \rightarrow 500\,000 \text{ droplet barcodes}$$

Our results show that we have identified 120 816 barcode clusters, corresponding to an estimated efficiency of 24% – 56%. It is worth noting that the sequencing depth heavily influences this measure of efficiency, and the limited 3.2M reads generated for the 8-plex sample is likely to be detrimental to this estimate. A large proportion of barcode clusters identified only had one read pair, which was then excluded from downstream data analysis steps (Supplementary Figure 3).

Given an estimated number of droplets we can calculate theoretical rate of monoclonality for the template molecules in our assay, according to the Poisson distribution we can expect between 92% and 96% monoclonal droplets (11). Counting the number of barcode clusters in which more than one different HLA template is present can experimentally validate this figure. We found that 112 out of 3825 clusters with  $\geq 20$  reads contained reads from multiple sample ID-tags, corresponding to a doublet rate of 2.93% of clusters and 2.51% of the total read population. It should be acknowledged however, that this measure is based on the assumption that the targets covering exon 1 has enough read coverage for both template molecules, which may not always be the case. Unfortunately there is no way of identifying the frequency of droplets with more than one barcoding molecule, but given the number of input molecules the rate of monoclonality should be within the same range as that of template molecules.
